# Supplementary material for: Contrasting decadal trends of subsurface excess nitrate in the western and eastern North Atlantic Ocean
Source: Copernicus journal article supplement (doi:10.5194/bg-2020-87), 2020-03-20
Supplement: Supplementary file [file bg-2020-87-AC2-supplement.pdf]

***Interactive comment on “Contrasting decadal trends of subsurface excess nitrate in the western and eastern North Atlantic Ocean” by Jin-Yu Terence Yang et al.***

**Anonymous Referee #2**

The paper “Contrasting decadal trends of subsurface excess nitrate in the western and eastern North Atlantic Ocean” presents an impressive compilation of nutrient data from the North Atlantic (NA) Ocean. The main result is a DIN excess increase in subsurface waters of the western NA during the last 3 decades, which might be explained by anthropic atmospheric nitrogen deposition. Some other results, interesting interpretation and discussion follows, but according to my analysis the main result should be discussed before, relying on the accuracy of DIP measurements necessary for DIN excess calculation. I will begin with this major concern and follow with other comments.

[Response] We thank this referee for the constructive comments, and believe that the revised manuscript has been considerably improved as a result of the referee’s suggestions. We have addressed all issues raised and provide our point-by-point replies below.

**Major concern:**

Page 5 (106-109): the analysis of nutrient data was based only on concentrations greater than  $0.1 \mu\text{mol kg}^{-1}$  for DIN and  $0.01 \mu\text{mol kg}^{-1}$  for DIP. These concentration levels approximate the detection limits of DIN and DIP for the analytical methods used in the field observations (Zhang 109 et al., 2001; Hydes et al., 2010).

A similar colorimetric method is used to measure nitrate and phosphate in seawater using autoanalyzers, and there are no apparent reasons to consider a detection limit which is 10 times lower for phosphate than for nitrate. It would have been the case if the cell used to measure phosphate compare to nitrate had been 10 times longer, but it was not the case at least for the WOCE and previous cruises. Considering Redfield proportion (N:P=16:1) or what you have considered (N:P=15:1), it is clear that more than 10 times increased precision is useful to correctly interpret biogeochemical processes in the Sea. It is the reason why many efforts were done to lower the quantification limits for phosphate measurements, using nanomolar methods particularly in surface waters. A recent paper stipulates that “The underlying reason for a limited understanding in the distribution of surface DIP is that the standard methodology has high variance and low interlaboratory accuracy, below  $\sim 100 \text{ nM}$ ” (Aoyama et al., 2016; Martiny et al. 2019). Even if  $100 \text{ nM}$  may appear as a higher limit, it is the one you have considered for nitrate, and following my argument in the first sentence of this paragraph, it may be a plausible accuracy value. I ask you therefore to determine the uncertainties of DIN excess values, considering a  $100 \text{ nM}$  uncertainty in DIP measurements, in order to see if the increasing trend in DIN excess is still observable in this condition. This point is my major concern. It should at least be put forward first in your discussion.

(Explanation provided): Thank you for the insightful comments. First, we would like to clarify why the detection limits are different between DIN and DIP. Oceanographers have optimized their nutrient measurement methods for the range of nutrient concentrations in seawater. The WOCE and GO-SHIP repeat hydrography programs require full water column measurement of macronutrient concentrations in single analytical run using an autoanalyzer. The analytical methods are optimized to match the full range of DIN, DIP, and Si concentrations within their linear calibration range. As the maximum DIP concentrations in the water column were only  $2\text{--}3 \mu\text{M}$  (approximately 1/15 of the nitrate concentration), the phosphate measurement method was optimized to the lowest calibration range to maximize

its sensitivity, resulting in the detection limit for DIP being approximately 10-fold lower than that for nitrate. Similar to the detection limits, the precision by the shipboard autoanalyzer was  $0.1 \mu\text{M}$  for DIN and  $0.01 \mu\text{M}$  for DIP. The overall uncertainty was 0.4% for both DIN and DIP in deep waters (GO-SHIP Cruise report: A16N, 2013).

(Change made): Our estimation of the excess N ( $\text{DIN}_{\text{xs}}$ ) focused exclusively on data collected from 200–600 m depth, where the nutrient concentrations were greater than  $1.4 \mu\text{mol kg}^{-1}$  for DIN and  $0.08 \mu\text{mol kg}^{-1}$  for DIP. The lower ends of the DIN and DIP concentrations in these waters were several-fold greater than the detection limits for DIN and DIP. We understand the concern of this referee about the overall uncertainty of low DIP measurements, which include errors in both precision and accuracy. To be conservative and to eliminate any potential bias in the  $\text{DIN}_{\text{xs}}$  estimates, in revised manuscript (lines 116–119) we have removed data (1.4% in a total of 1955) involving DIP concentration  $< 100 \text{ nM}$  to. Removing these low DIP concentration data did not alter our finding of a trend of increase in excess nitrate in the western subtropical NATl. We also accounted for errors in our  $\text{DIN}_{\text{xs}}$  estimates (the symbol size shown in Figures 3-5 covers the errors) by using an overall uncertainty of 0.4% for both DIN and DIP for the targeted water depth ranges. We have clarified this issue in the revised text (lines 165–168) and figure captions.

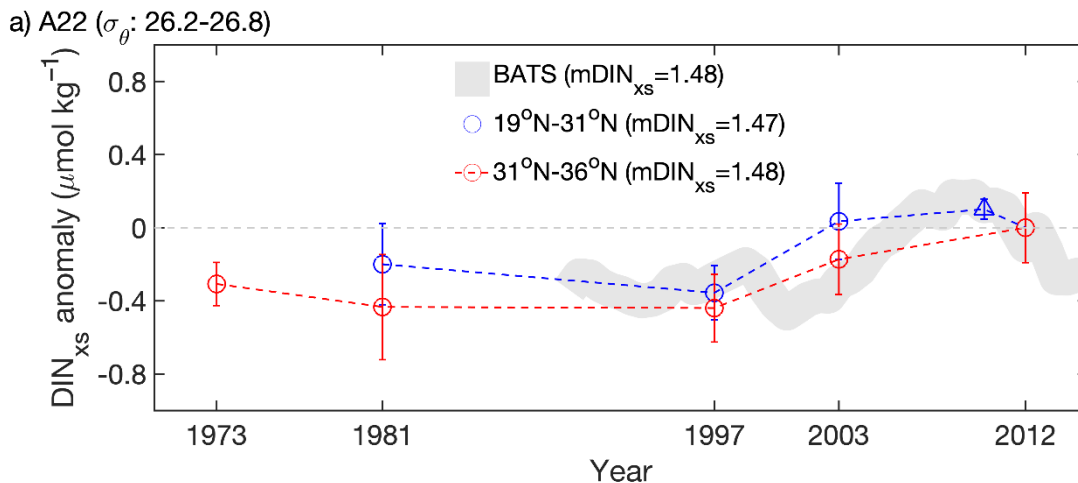

Other comments:

Line 36: You use DIN for nitrogen; therefore, it would be preferable to use DIP for phosphate.

(Change made): We have use “DIP” for phosphate.

Lines 48-52 It would be preferable to reinforce the demonstration of the main result rather than propose new hypotheses far from the main result.

(Change made): To accommodate this suggestion, we have changed the last part of the Abstract and Section 3.5. The revised Abstract now reads: “*In contrast, a decreasing trend in subsurface  $\text{DIN}_{\text{xs}}$  was observed after the 2000s in the eastern NATl, particularly in the high latitudes. This finding was not associated with the comparable decrease in AND from Europe. Other natural processes (a possible decline in tropical  $\text{N}_2$  fixation and weakening of the Atlantic meridional overturning circulation) may be responsible, but lack of more time-resolved data on  $\text{N}_2$  fixation and meridional circulation is an impediment to assessment of these processes.*”

Line 55 Nr means nothing for me. You could use DIN, defined as the sum of nitrate  $\text{NO}_3^-$ , nitrite  $\text{NO}_2^-$  and ammonium  $\text{NH}_4^+$  where nitrite is usually negligible.

(Change made): In the revised manuscript we have used bioavailable nitrogen (the sum of nitrate, nitrite and ammonium) throughout.

Lines 59-60 Anthropogenic nitrogen deposition (AND) to the contemporary ocean is comparable in magnitude to marine biological N<sub>2</sub> fixation: add reference(s).

(Change made): We have cited the publication of Duce et al. (2008) in the main text and included it in the reference list. This paper supports our statement above.

Duce, R. A., LaRoche, J., Altieri, K., et al.: Impacts of atmospheric anthropogenic nitrogen on the open ocean, *Science*, 320, 893-897, <http://doi.org/10.1126/science.1150369>, 2008

Line 64 Delete pollutant nitrogen, replace with DIN.

(Change made): We have replaced “pollutant nitrogen” with “*bioavailable nitrogen*”.

Lines 93-94 The sentence at the end of this paragraph uses an older reference than the statement just before, making it a bit confusing.

(Change made): A more recent and relevant publication (Gruber et al., 2014) has been cited in the revised text and included it in the reference list.

Gruber, N., and Deutsch, C. A.: Redfield's evolving legacy, *Nat. Geosci.*, 7, 853-855, <http://doi.org/10.1038/ngeo2308>, 2014.

Lines 102-109 This refers to my major concern explained in the upper part of this report.

(Change made): We have thoroughly addressed this concern in the revised manuscript. See our response to comment 1.

Lines 114-115 Which is a major source region of anthropogenic nitrogen according to a model-derived atmospheric NO<sub>x</sub> deposition (Dentener et al., 2006; Fig. 1). It is not data but model-derived prediction. This information is important and needs to be added here and not only in the figure legend. If you want to look at a comparison between prediction and data in another context, I invite you to read this short interesting paper (Grüber, 2016).

(Change made): In the revised manuscript (lines 123–125) we have explicitly indicated that the North America continent was identified as a major source of anthropogenic nitrogen, based on model predictions.

Lines 138-140 The finding that the subsurface deltaDIN<sub>xs</sub> signals were considerably greater than the detection limit of DIN is a strong indication that our data adjustments probably did not influence the temporal trend of DIN<sub>xs</sub>. I agree with the adjustments, but deltaDIN<sub>xs</sub> signals depend on DIN and DIP, and the accuracy will largely differ depending on what you choose as a quantification limit for DIP (see my first comment).

(Change made): See our response to the major concern raised by this referee.

Line 145 Deficit? Don't you mean excess?

(Change made): To avoid confusion, we have deleted “deficit”. The revised sentence now reads “*We calculated the DIN surplus relative to DIP...*”.

Line 166 Fig. S4. See Line 109 in the SM, after (b), A20 is missing.

(Change made): We have added “A20” after (b).

Line 178 I am not sure that the introduction of anomalies here helps the readers. You will then compare anomalies and anomalies of excess, which have completely different uncertainties.

(Change made): To explain the anomalies in Figures 3 and 4 we have moved the sentence (For each subregion,  $DIN_{xs}$  (or DIP) anomalies indicates individual  $DIN_{xs}$  (or DIP) values minus.....) to the captions to these figures.

Lines 183-200 It is the main result which needs to be reinforced with a discussion on  $DIN_{xs}$  uncertainties. I wonder if a result/discussion part on DIN evolution rather than  $DIN_{xs}$  (depending on DIP concentration which may be harder to measure with enough accuracy) evolution will not be more straightforward and easier to publish.

(Explanation only): For the evolution of DIN concentrations over time, changes in the DIN concentration can be associated with change in the rate of organic matter oxidation and the input of anthropogenic N at the target density range. The use of  $DIN_{xs}$  (excess DIN relative to DIP) was to remove the change in N associated with organic matter oxidation. By doing so, the evolution of  $DIN_{xs}$  can primarily be attributed to the evolution of input of anthropogenic N. We have also considered errors in the  $DIN_{xs}$  estimates in the revised manuscript. Please see our response to the major concern raised by this referee.

Line 189 Fig. S6. See Line 131 in the SM, different and no difference.

(Change made): As a west-east gradient in excess nitrate along the transect A05 at 24.5°N latitude in the central gyre was unclear, we have deleted this statement.

Lines 201-202 Fig. 3 presents  $DIN_{xs}$  and not  $\Delta DIN_{xs}$ .

(Change made): We have changed "... $\Delta DIN_{xs}$  in the Natl...." to "...variations in  $DIN_{xs}$  in the Natl....".

Line 203 (measurement year)?

(Change made): To avoid confusion we have replaced "measurement year" by "the year of a cruise carried out".

Lines 221-222 which is subject to considerable AND input from the North American continent. Add reference(s).

(Change made): A more relevant publication (Dentener et al., 2006) has been cited in the revised text and included in the reference list.

Dentener, F., et al.: Nitrogen and sulfur deposition on regional and global scales: A multimodel evaluation, *Global Biogeochem. Cycles*, 20, GB4003, <http://doi.org/10.1029/2005gb002672>, 2006.

Line 222 Recent studies suggest that the reduced form of nitrogen... Do you mean  $NH_4^+$ ?

(Change made): In the revised manuscript we have amended the text to refer to two reduced forms of nitrogen (ammonium and dissolved organic nitrogen).

Line 224 Thus? Marine nitrogen fixation is an autochthonous process which influences  $DIN_{xs}$ !

(Change made): As the reduced form of nitrogen in atmospheric deposition largely originates from the surface ocean (Altieri et al., 2014; Altieri et al., 2016), we have replaced "this autochthonous reduced nitrogen..." by "this marine-derived reduced nitrogen..." By doing so, we have eliminated the possibility of  $N_2$  fixation.

Line 225 Therefore?

(Change made): We have deleted “Therefore” in the revised text because the sentence reads well without it.

Line 226 Emissions? Only deposition. If you add significant amount of  $\text{NH}_4^+$  by the atmosphere, it will certainly influence  $\text{DIN}_{\text{xs}}$  values. I am not able to follow your reasoning there.  $\text{NO}_x$  is introduced without being defined.

(Change made): In the revised manuscript we have removed reference to  $\text{NO}_x$  emissions from the sentence because these emissions did not influence seawater  $\text{DIN}_{\text{xs}}$  values. In the revised text we have defined  $\text{NO}_x$  as the oxidized form of nitrogen.

We agree that some atmospheric  $\text{NH}_4^+$  is of anthropogenic origin, and to a minor extent could contribute to the  $\text{DIN}_{\text{xs}}$  increase. Based on the observations of Altieri et al. (2014; 2016), only a small fraction of the reduced nitrogen (<30% of  $\text{NH}_4^+$  and 17% of organic nitrogen) in atmospheric deposition is of anthropogenic origin.

Lines 266-278 All this part will be clearer if DIN inventory is used instead of  $\text{DIN}_{\text{xs}}$  inventory.

(Change made): As suggested by this referee, we have added the statement (lines 297–299): “*The atmospheric deposition possesses considerably high N:P ratio (up to >1000; Baker et al., 2010), which would mainly contribute to the DIN inventory in the western Natl.*”. This clarifies that the DIN inventory was used instead of the  $\text{DIN}_{\text{xs}}$  inventory.

Line 315 In this region (boxes 1–3). Please, add Fig. 5a.

(Change made): We have added “Fig. 5a” next to “boxes 1-3”.

Line 317” The atmospheric  $\text{NO}_x$  deposition. Replace with “the modelled atmospheric  $\text{NO}_x$  deposition”.

(Change made): We have replaced “the atmospheric  $\text{NO}_x$  deposition” with “*the modelled atmospheric  $\text{NO}_x$  deposition*”.

Line 346 The formation of the STMW is generally enhanced when the NAO index becomes negative. Please, add reference(s).

(Change made): The publication by Rodwell et al. (1999) has been newly cited to support the statement above.

Rodwell, M. J., Rowell, D. P., and Folland, C. K.: Oceanic forcing of the wintertime North Atlantic Oscillation and European climate, *Nature*, 398, 320-323, 1999.

Line 356 Fig. S7b. Please also represent the DIN anomaly, and for each graph use the proportion you have defined (N:P=15:1) in the axes to better represent N and P. Refer to my remark for Fig. S12.

(Change made): We have added the DIN anomaly and adjusted the axes accordingly.

Line 370 but little change in DIP was observed (Fig. S12). If you correctly represent the axes using N:P=15:1, as defined as a relevant ratio by yourself, you might not conclude that little change in DIP was observed. For DIN represented between 12.5 and 14.5  $\mu\text{mol kg}^{-1}$ , please represent DIP between 0.83 and 0.97  $\mu\text{mol kg}^{-1}$ . It is the only way to graphically compare N

and P evolutions. Are the evolutions of DIN and DIP different? or are the uncertainties between DIN and DIP measurements, at the level needed, different?

(Change made): As suggested by this referee, we have revised Fig. S12 to include comparable scales for DIN and DIP, using N:P=15:1. In this figure having comparable scales for N and P, the evolutions of DIN and DIP are different. Consequently, we rephrased the statement, which now reads: “*A significant decrease in the subsurface (300–500 m) DIN between 1998 and 2013 was also found at a site (68.0°N, 12.7°W) in the northern Iceland Sea, but concurrent decrease in DIP was not observed (Fig. S12). As a result, subsurface DIN<sub>xs</sub> therein declined remarkably after 2005.*”

Line 364-409 All this part is speculative. A paper focusing on proving the main result would be more interesting.

(Change made): We have considerably shortened the speculative hypothesis and explanations in the revised Abstract and Section 3.5. In particular, we have deleted much of Section 3.5 (mostly speculative explanations for N<sub>2</sub> fixation and AMOC). This section retains a brief explanation for the decrease in anthropogenic N from Europe, as we evaluated this possibility based on data.
